# Supplementary material for: Systematic overestimation of evapotranspiration over irrigated areas by an offline land surface model
Source: Copernicus journal article supplement (doi:10.5194/egusphere-2024-3562), 2025-02-11
Supplement: Supplementary file [file egusphere-2024-3562-AC1-supplement.pdf]

## Answer to RC2:

*This is a well-written article on an important topic. The experimental design and data analysis seem adequate. I have only two very minor comments below. I couldn't find any visualization over the whole study duration. This can be beneficial to include.*

*Minor comments:*

*- Subsection numbering is not consistent. For instance, there is a “Materials and methods” section (Section #2), but no “Results” section.*

*- Figures 1-3: Is there any specific reason that the actual values over the entire experiment duration are not shown and only the average values are presented and compared with modeling schemes?*

Thank you for your very positive review. We did not provide visualisation over the whole study duration and opted for average values in Figures 1–3 to make the figures more readable. We will provide equivalent figures for the whole period in the supplementary materials of the revised version to avoid making the article too long. The section numbering will also be revised, and a 'Results' section will be added.
